# Supplementary material for: The unmet mental health needs of U.S. adults living with chronic pain
Source: PubMed Central journal article supplement — Pain. 2024 Jul 30;165(12):2877–87. doi: 10.1097/j.pain.0000000000003340 (PMC11562766; doi:10.1097/j.pain.0000000000003340), 2024-07-30
Supplement: jop-165-2877-s001.pdf [file jop-165-2877-s001.pdf]

**Supplemental Table 1.** Intent-to-treat anxiety and depression (Universe = U.S. adults who reported past 12-months use of mental health treatment and screened negative for unremitted anxiety (GAD-7) and depression (PHQ-8). n=(4704)

|                                                           | No Chronic Pain | Chronic Pain | All   |
|-----------------------------------------------------------|-----------------|--------------|-------|
| <b>Medication only</b>                                    | 49.9%           | 61.9%        | 53.3% |
| <i>% intent-to-treat A/D</i>                              | 84.4%           | 91.8%        | 86.8% |
| <b>Therapy only</b>                                       | 23.6%           | 13.0%        | 20.6% |
| <i>% ever told by a health professional they have A/D</i> | 27.8%           | 39.2%        | 29.8% |
| <b>Both Medication and Therapy</b>                        | 26.5%           | 25.1%        | 26.1% |
| <i>% intent-to-treat A/D</i>                              | 85.8%           | 87.2%        | 85.9% |
|                                                           |                 |              |       |
| <b>All mental health treatment approaches</b>             | 100%            | 100%         | 100%  |
| <i>% evidence suggests intent-to-treat A/D</i>            | 71.4%           | 83.8%        | 74.8% |

**No Chronic Pain**  $(.499 * .844) + (.236 * .278) + (.265 * .858) = 42.1\% + 6.6\% + 22.7\% =$  at least **71.4%** of mental treatment used by those without chronic pain who screened negative for unremitted anxiety and depression was likely intended for the treatment of anxiety or depression.

**Chronic Pain**  $(.619 * .918) + (.130 * .392) + (.251 * .872) = 56.8\% + 5.1\% + 21.9\% =$  at least **83.8%** of mental health treatment used by those living with chronic pain who screened negative for unremitted anxiety and depression was likely intended for the treatment of anxiety or depression.

**All**  $(.533 * .868) + (.206 * .298) + (.261 * .859) = .463 + .061 + .224 =$  at least **74.8%** of mental health treatment used by U.S. adults who screened negative for unremitted anxiety and depression was likely intended for the treatment of anxiety or depression.

**Supplemental Table 2.** Multiple logistic regression results for the association between past 12-months use of mental health treatment and subject characteristics (*restricted to U.S. adults with a mental health need*). Adjusted model: Area under the ROC curve=0.6794, n=7438

| Predictor (n)                                               | Unadjusted |              |         | Adjusted |              |         |
|-------------------------------------------------------------|------------|--------------|---------|----------|--------------|---------|
|                                                             | OR         | CI 95%       | p-value | OR       | CI 95%       | p-value |
| <b>Health Insurance Status (7467)</b>                       |            |              |         |          |              |         |
| Uninsured                                                   | 0.262***   | 0.209, 0.329 | <0.001  | 0.292*** | 0.230, 0.370 | <0.001  |
| <b>Sex (7474)</b>                                           |            |              |         |          |              |         |
| Male                                                        | 0.644***   | 0.544, 0.764 | <.001   | 0.643*** | 0.540, 0.765 | <0.001  |
| <b>Age (7469)<br/>(ref = 35-44)</b>                         |            |              |         |          |              |         |
| 18-24                                                       | 0.612***   | 0.454, 0.825 | 0.001   | 0.562*** | 0.410, 0.771 | <0.001  |
| 25-34                                                       | 0.781      | 0.600, 1.017 | 0.066   | 0.791    | 0.599, 1.046 | 0.100   |
| 45-54                                                       | 1.126      | 0.845, 1.500 | 0.417   | 1.130    | 0.831, 1.535 | 0.436   |
| 55-64                                                       | 1.267      | 0.966, 1.663 | 0.087   | 1.351*** | 1.005, 1.816 | 0.046   |
| 65-74                                                       | 1.442***   | 1.107, 1.879 | 0.007   | 1.248    | 0.928, 1.680 | 0.142   |
| 75-84                                                       | 1.005      | 0.684, 1.477 | 0.978   | 0.919    | 0.628, 1.346 | 0.665   |
| 85+                                                         | 0.756      | 0.472, 1.212 | 0.244   | 0.747    | 0.435, 1.281 | 0.288   |
| <b>Race/Ethnicity (7476)<br/>(ref = Non-Hispanic White)</b> |            |              |         |          |              |         |
| Hispanic                                                    | 0.583***   | 0.449, 0.756 | <0.001  | 0.690*** | 0.525, 0.908 | 0.008   |
| Black or African American                                   | 0.431***   | 0.339, 0.550 | <0.001  | 0.445*** | 0.346, 0.573 | <0.001  |
| Asian                                                       | 0.453***   | 0.275, 0.744 | 0.002   | 0.383*** | 0.231, 0.633 | <0.001  |
| AIAN (only)                                                 | 0.512***   | 0.250, 1.047 | 0.067   | 0.438**  | 0.205, 0.937 | 0.033   |
| AIAN and other single and multiple races                    | 1.261      | 0.616, 2.585 | 0.525   | 1.523    | 0.725, 3.200 | 0.266   |
| Other single and multiple races                             | 0.604      | 0.269, 1.358 | 0.222   | 0.867    | 0.417, 1.800 | 0.701   |
| <b>Cancer (7469)</b>                                        |            |              |         |          |              |         |
| Has ever been diagnosed with cancer                         | 1.388***   | 1.091, 1.765 | 0.008   | 1.109    | 0.863, 1.425 | 0.419   |
| <b>Activities of daily living (7476)</b>                    |            |              |         |          |              |         |
| Is limited in daily functioning                             | 0.730***   | 0.608, 0.877 | 0.001   | 0.796*** | 0.647, 0.979 | 0.031   |
| <b>Chronic Pain (7463)</b>                                  |            |              |         |          |              |         |
| Experiences pain most days or every day                     | 0.684***   | 0.578, 0.809 | <0.001  | 0.597*** | 0.489, 0.729 | <0.001  |

\*\*\*Statistically significant using an alpha-level 0.05 Rao-Scott likelihood ratio chi-square (Satterthwaite) test  
Data source: National Health Interview Survey Adults, 2019

**Supplemental Table 3.** Multiple logistic regression results for the association between presence of unremitted anxiety or depression symptoms of day of survey and subject characteristics (restricted to U.S. adults who reported past 12-months use of mental health treatment). Adjusted model: Area under the ROC curve=0.7452, n=6402

| Predictor (n)                                                                                                     | Unadjusted |              |         | Adjusted |              |         |
|-------------------------------------------------------------------------------------------------------------------|------------|--------------|---------|----------|--------------|---------|
|                                                                                                                   | OR         | CI 95%       | p-value | OR       | CI 95%       | p-value |
| <b>Health Insurance Status (6427)</b>                                                                             |            |              |         |          |              |         |
| Uninsured                                                                                                         | 1.499***   | 1.136, 1.977 | 0.004   | 1.342    | 0.976, 1.844 | 0.070   |
| <b>Sex (6432)</b>                                                                                                 |            |              |         |          |              |         |
| Male                                                                                                              | 0.946      | 0.816, 1.097 | 0.464   | 0.974    | 0.833, 1.140 | 0.744   |
| <b>Age (6426)<br/>(ref = 35-44)</b>                                                                               |            |              |         |          |              |         |
| 18-24                                                                                                             | 0.839      | 0.618, 1.139 | 0.259   | 1.034    | 0.736, 1.451 | 0.849   |
| 25-34                                                                                                             | 0.973      | 0.770, 1.230 | 0.818   | 1.207    | 0.930, 1.566 | 0.156   |
| 45-54                                                                                                             | 1.340***   | 1.086, 1.653 | 0.006   | 1.064    | 0.838, 1.352 | 0.610   |
| 55-64                                                                                                             | 1.070      | 0.853, 1.342 | 0.559   | 0.682*** | 0.530, 0.878 | 0.003   |
| 65-74                                                                                                             | 0.778***   | 0.616, 0.982 | 0.035   | 0.504*** | 0.385, 0.659 | <0.001  |
| 75-84                                                                                                             | 0.656***   | 0.484, 0.889 | 0.007   | 0.299*** | 0.210, 0.427 | <0.001  |
| 85+                                                                                                               | 1.465      | 0.890, 2.409 | 0.132   | 0.448*** | 0.268, 0.748 | 0.002   |
| <b>Race/Ethnicity (6433)<br/>(ref = Non-Hispanic White)</b>                                                       |            |              |         |          |              |         |
| Hispanic                                                                                                          | 1.711***   | 1.364, 2.148 | <0.001  | 1.766*** | 1.365, 2.283 | <0.001  |
| Black or African American                                                                                         | 1.266***   | 1.000, 1.602 | 0.050   | 0.926    | 0.700, 1.223 | 0.586   |
| Asian                                                                                                             | 0.886      | 0.546, 1.438 | 0.623   | 1.233    | 0.748, 2.033 | 0.411   |
| AIAN (only)                                                                                                       | 1.467      | 0.738, 2.918 | 0.274   | 1.379    | 0.633, 3.003 | 0.418   |
| AIAN and other single and multiple races                                                                          | 2.327      | 1.312, 4.127 | 0.004   | 1.777    | 0.994, 3.174 | 0.052   |
| Other single and multiple races                                                                                   | 2.169      | 1.147, 4.101 | 0.017   | 1.896    | 0.943, 3.813 | 0.073   |
| <b>Cancer (6428)</b>                                                                                              |            |              |         |          |              |         |
| Has ever been diagnosed with cancer                                                                               | 1.154      | 0.947, 1.405 | 0.155   | 1.161    | 0.938, 1.438 | 0.169   |
| <b>Activities of everyday living (6433)</b>                                                                       |            |              |         |          |              |         |
| Is limited in daily functioning                                                                                   | 5.053***   | 4.285, 5.960 | <0.001  | 4.588*** | 3.841, 5.481 | <0.001  |
| <b>Chronic Pain (6421)</b>                                                                                        |            |              |         |          |              |         |
| Experiences pain most days or every day                                                                           | 3.961***   | 3.452, 4.546 | <0.001  | 3.696*** | 3.161, 4.323 | <0.001  |
| ***Statistically significant using an alpha-level 0.05 Rao-Scott likelihood ratio chi-square (Satterthwaite) test |            |              |         |          |              |         |
| Data source: National Health Interview Survey Adults, 2019                                                        |            |              |         |          |              |         |
